# Supplementary material for: The Drosophila Genome Nexus: A Population Genomic Resource of 623 Drosophila melanogaster Genomes, Including 197 from a Single Ancestral Range Population
Source: Oxford University Press journal article supplement (doi:10.1534/genetics.115.174664), 2015-01-27
Supplement: figures2.pdf [file figures2.pdf]

Figure S2.

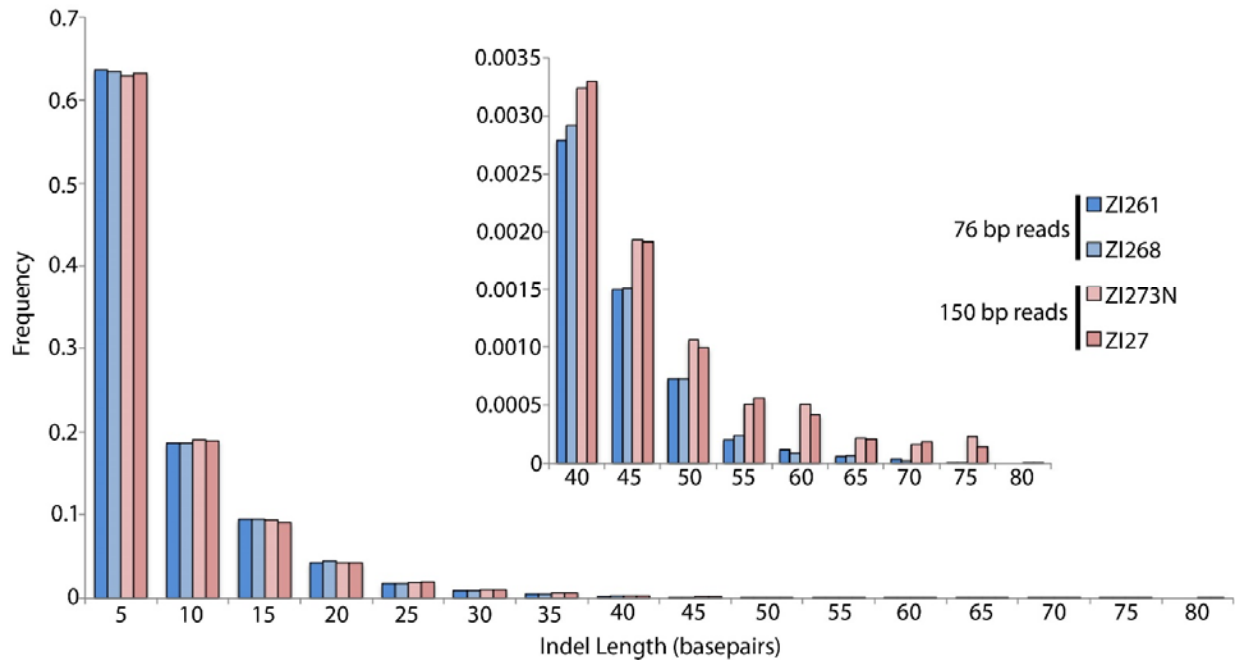

**Figure S2** Length distributions for called indels for 46 bp (blue) and 150 bp (pink) read lengths. The inset zooms in on the frequencies for lengths  $\geq 40$  bp.
