# Supplementary material for: The Drosophila Genome Nexus: A Population Genomic Resource of 623 Drosophila melanogaster Genomes, Including 197 from a Single Ancestral Range Population
Source: Oxford University Press journal article supplement (doi:10.1534/genetics.115.174664), 2015-01-27
Supplement: figures4.pdf [file figures4.pdf]

Figure S4

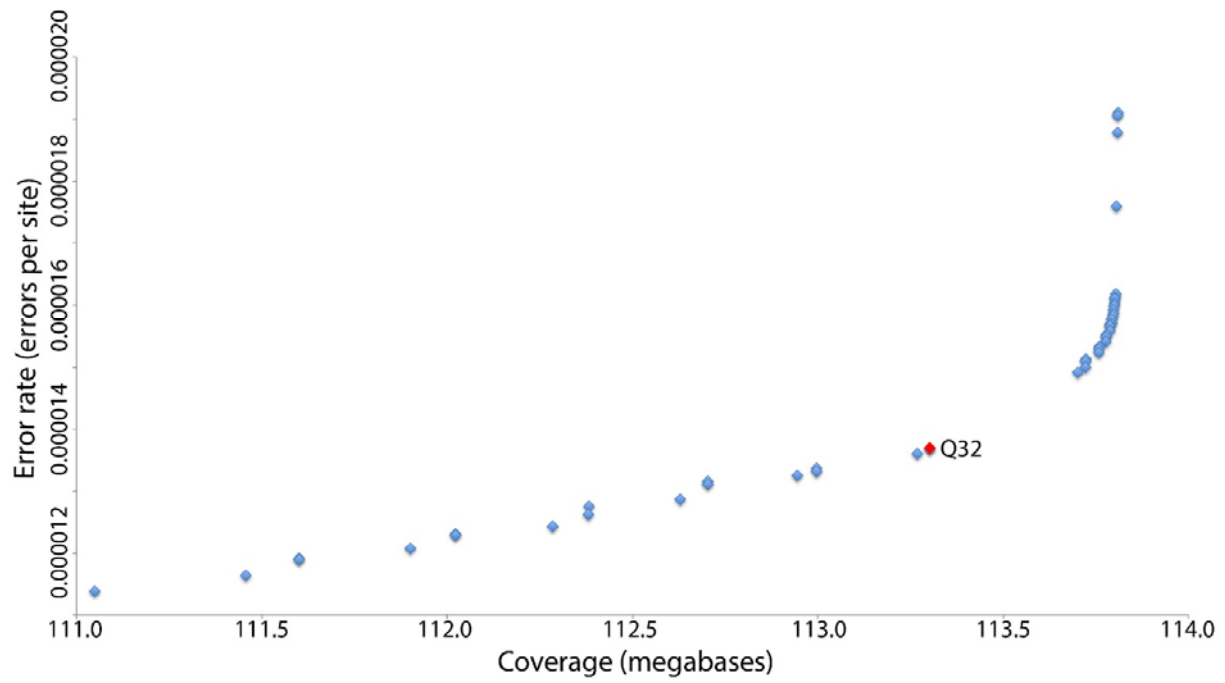

**Figure S4** Evaluation of the tradeoff between genomic coverage and error rate for the diploid caller of the Unified Genotyper; quality values ranged from 10 to 100. Resequenced genomes from the reference strain ( $y^1 cn^1 bw^1 sp^1$ ) were modified to simulate realistic levels of variation. We chose a cutoff of Q32 (red) to maximize coverage and minimize error.
