# Supplementary material for: The Drosophila Genome Nexus: A Population Genomic Resource of 623 Drosophila melanogaster Genomes, Including 197 from a Single Ancestral Range Population
Source: Oxford University Press journal article supplement (doi:10.1534/genetics.115.174664), 2015-01-27
Supplement: figures5.pdf [file figures5.pdf]

Fig. S5

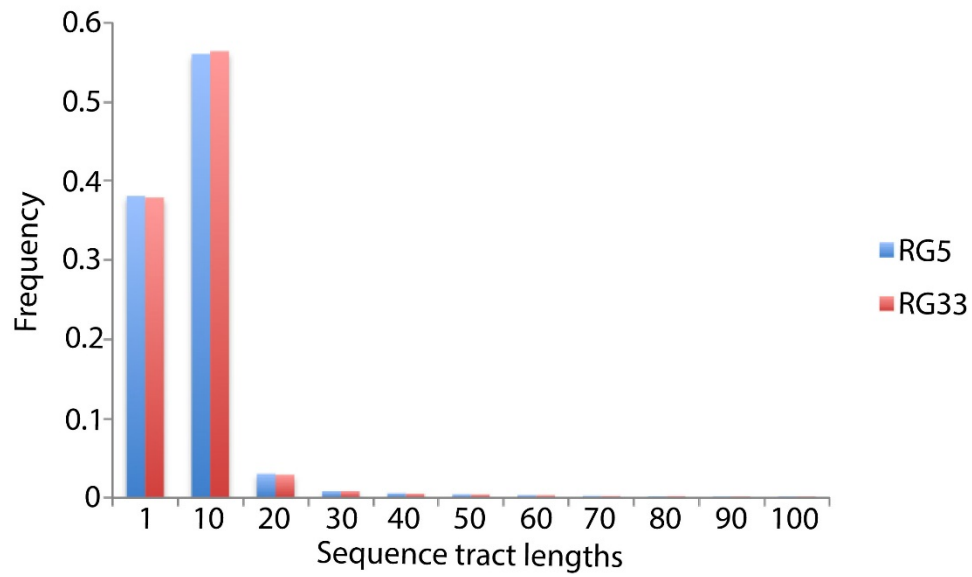

**Figure S5** Histogram of sequence tract lengths for sites added by our two round pipeline for the Rwandan genomes RG5 and RG33.
