# Supplementary material for: The Drosophila Genome Nexus: A Population Genomic Resource of 623 Drosophila melanogaster Genomes, Including 197 from a Single Ancestral Range Population
Source: Oxford University Press journal article supplement (doi:10.1534/genetics.115.174664), 2015-01-27
Supplement: figures6.pdf [file figures6.pdf]

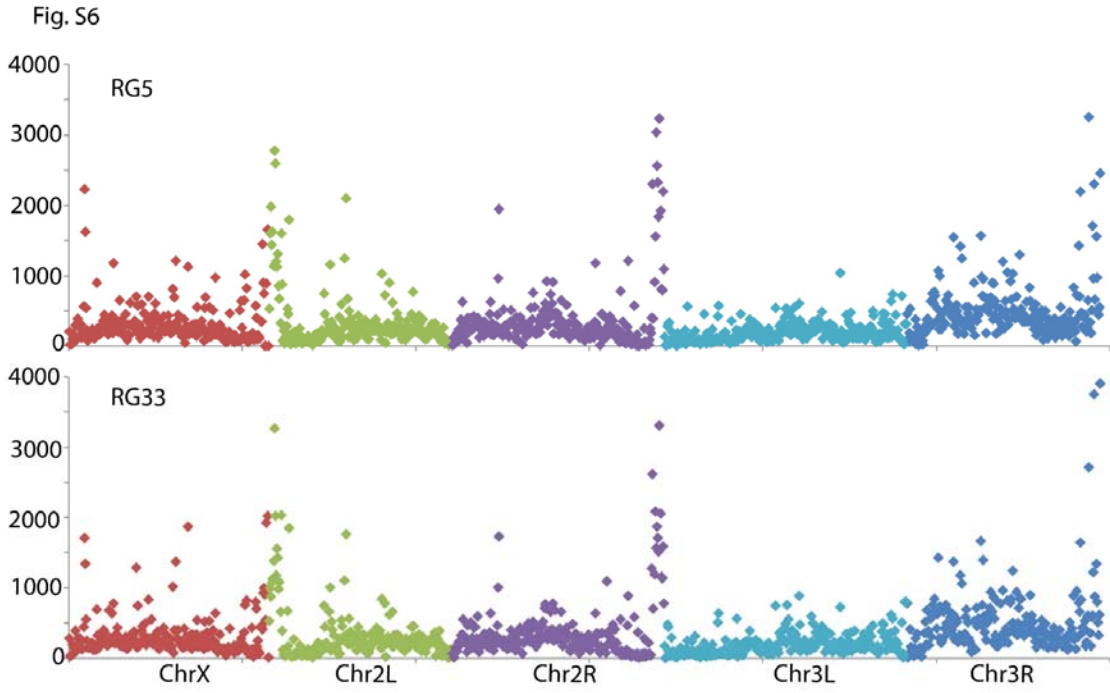

**Figure S6** Number of sites added by our two round assembly pipeline in 100 kb windows across the 5 euchromatic chromosome arms for the Rwandan genomes RG5 and RG33.
