# Supplementary material for: The Drosophila Genome Nexus: A Population Genomic Resource of 623 Drosophila melanogaster Genomes, Including 197 from a Single Ancestral Range Population
Source: Oxford University Press journal article supplement (doi:10.1534/genetics.115.174664), 2015-01-27
Supplement: figures7.pdf [file figures7.pdf]

Figure S7

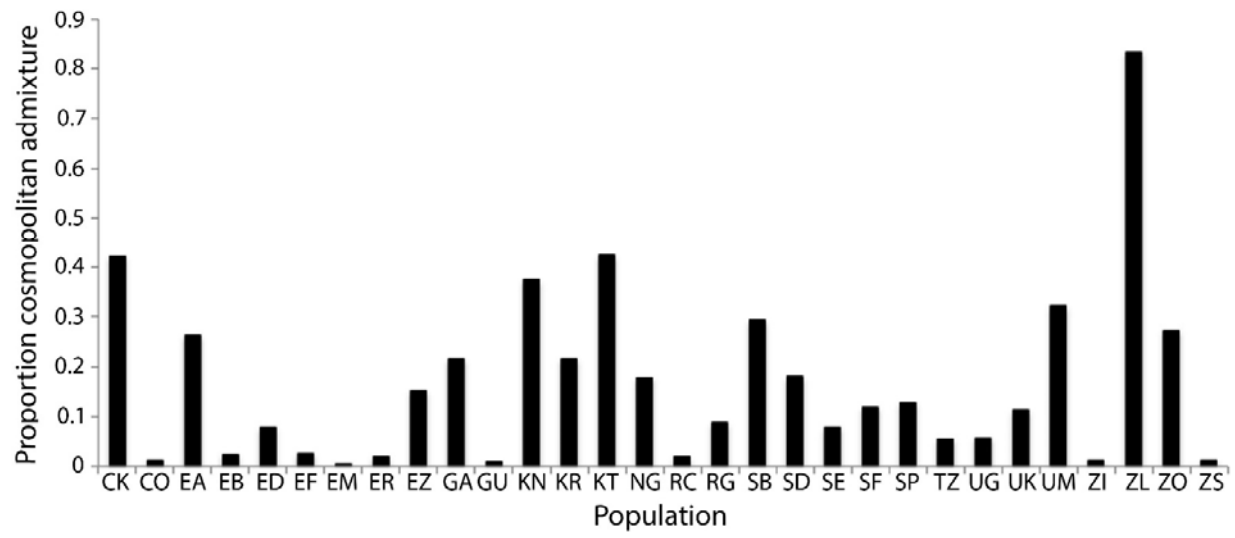

**Figure S7** Variation among African populations in estimated cosmopolitan admixture proportions.
