# Supplementary material for: The Drosophila Genome Nexus: A Population Genomic Resource of 623 Drosophila melanogaster Genomes, Including 197 from a Single Ancestral Range Population
Source: Oxford University Press journal article supplement (doi:10.1534/genetics.115.174664), 2015-01-27
Supplement: figures8.pdf [file figures8.pdf]

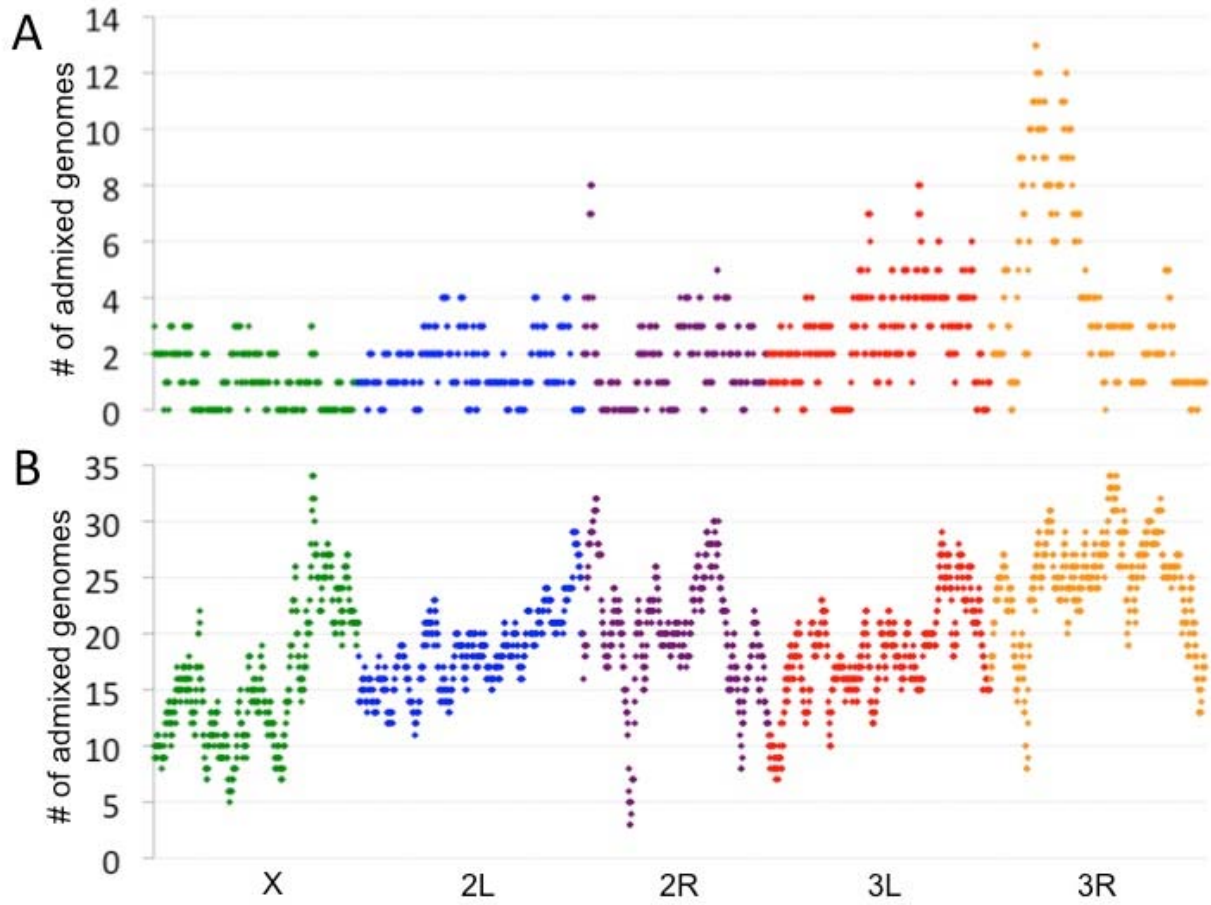

**Figure S8** Numbers of sub-Saharan genomes inferred to have cosmopolitan ancestry in each genomic window: (A) For the DPGP3 Zambia ZI sample, and (B) across all other sub-Saharan populations. Windows are depicted for arms X (green), 2L (blue), 2R (purple), 3L (red), and 3R (orange).
