# Supplementary figures and images for: The Drosophila Genome Nexus: A Population Genomic Resource of 623 Drosophila melanogaster Genomes, Including 197 from a Single Ancestral Range Population
Source: Oxford University Press journal article supplement (doi:10.1534/genetics.115.174664), 2015-01-27

Fig. S1

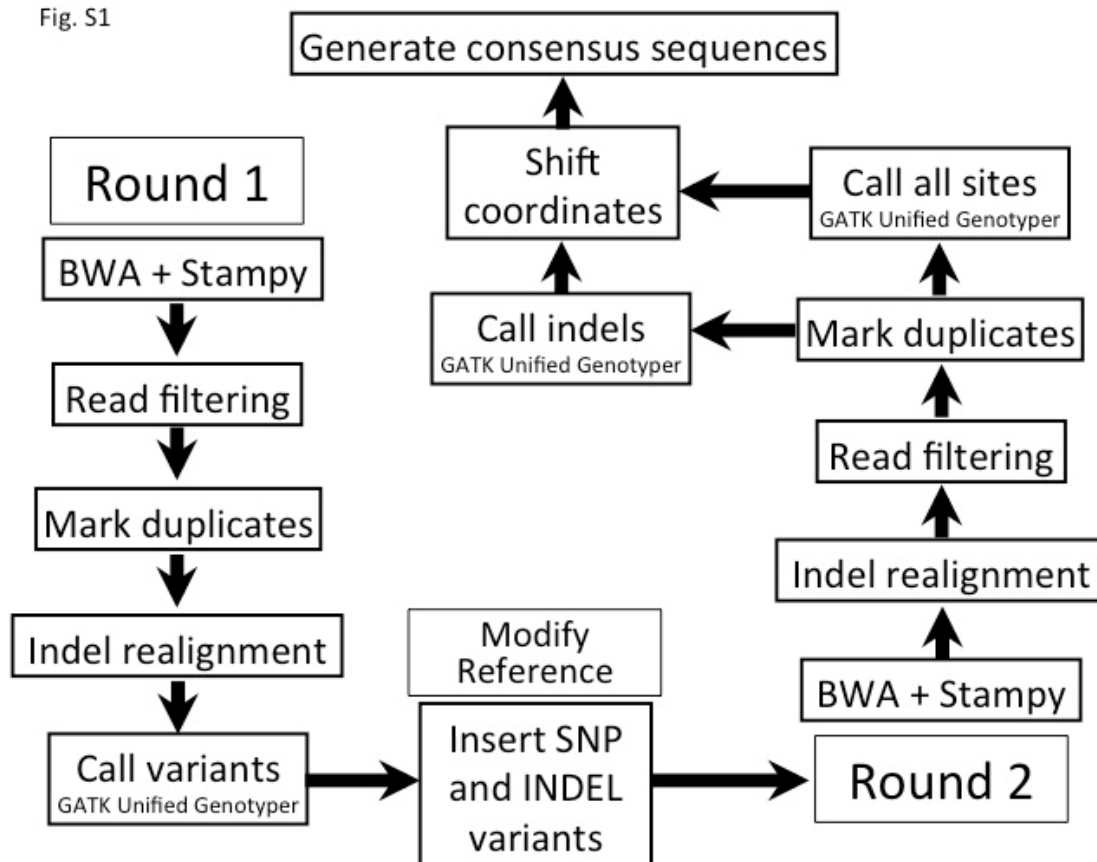

**Figure S1** Graphical depiction of the two round assembly pipeline.

Supplement: figures1.pdf [file figures1.pdf]
